# Supplementary material for: Comparison of the Effects of Monounsaturated Fatty Acids and Polyunsaturated Fatty Acids on Liver Lipid Disorders in Obese Mice
Source: MDPI journal article supplement (doi:10.3390/nu15143200), 2023-07-19
Supplement: s1 [file s1]

## Supplementary Figure

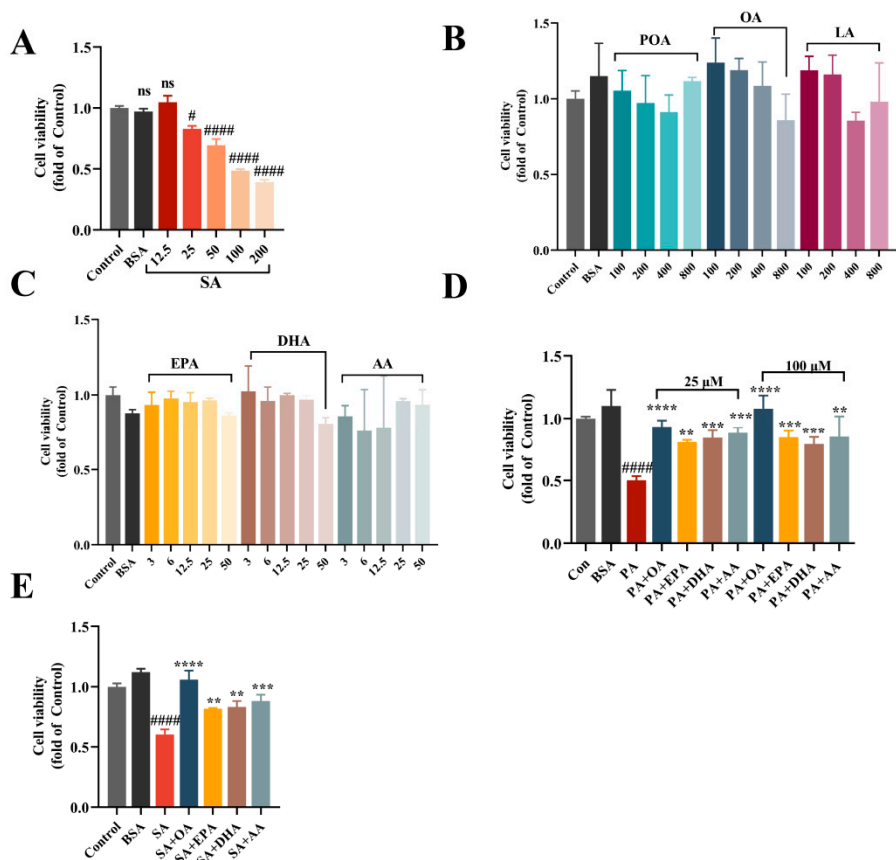

**Figure S1. UFAs improve cell viability damage.**

(A) Effects of different SA concentrations (12.5  $\mu$ M~200  $\mu$ M) incubated for 24 h on the viability of L-02 cells (BSA: 54  $\mu$ M). (B) Effect of different concentrations of POA (100  $\mu$ M~800  $\mu$ M), OA (100  $\mu$ M~800  $\mu$ M), LA (100  $\mu$ M~800  $\mu$ M), and incubation for 24 h on the viability of L-02 cells (BSA: 216  $\mu$ M). (C) The effect of different concentrations of EPA (3  $\mu$ M~50  $\mu$ M), DHA (3  $\mu$ M~50  $\mu$ M), and AA (3  $\mu$ M~50  $\mu$ M) on the viability of L-02 cells incubated for 24 h (BSA: 13.5  $\mu$ M). (D) L-02 cells treated with 25 or 100  $\mu$ M OA, EPA, DHA, and AA in combination with 100  $\mu$ M PA (BSA: 27  $\mu$ M). (E) L-02 cells treated with 100  $\mu$ M OA and 25  $\mu$ M EPA, DHA, and AA in combination with 100  $\mu$ M SA (BSA: 27  $\mu$ M). ns vs. Control group. # $P$ <0.01, ## $P$ <0.01, #### $P$ <0.0001 vs. BSA group. \*\* $P$ <0.01, \*\*\* $P$ <0.001, \*\*\*\* $P$ <0.0001 vs. PA group. Data are expressed as the mean  $\pm$  SD, ( $n \geq 3$ ). BSA as solvent control.

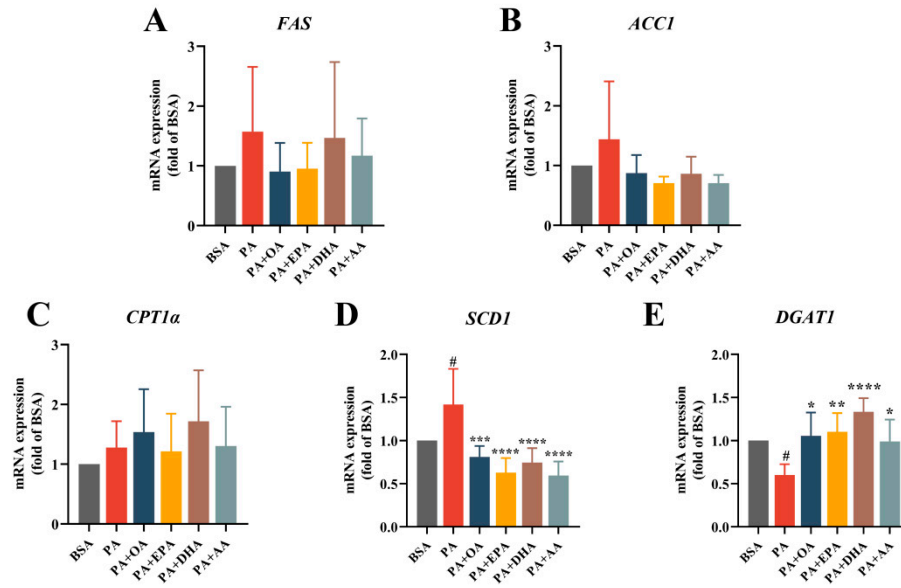

**Figure S2. Effects of the combined use of UFAs and PA on lipid metabolism genes. (A) FAS. (B) ACC1. (C) CPT1 $\alpha$ . (D) SCD1. (E) DGAT1.** (BSA: 27  $\mu$ M; PA: 100  $\mu$ M; EPA, DHA and AA: 25 $\mu$ M; OA: 100  $\mu$ M). \* $P$ <0.05, \*\* $P$ <0.01, \*\*\* $P$ <0.001, \*\*\*\* $P$ <0.0001 vs. PA group. # $P$ <0.05 vs. BSA group. Data are expressed as the mean  $\pm$  SD, ( $n \geq 3$ ). BSA as solvent control.

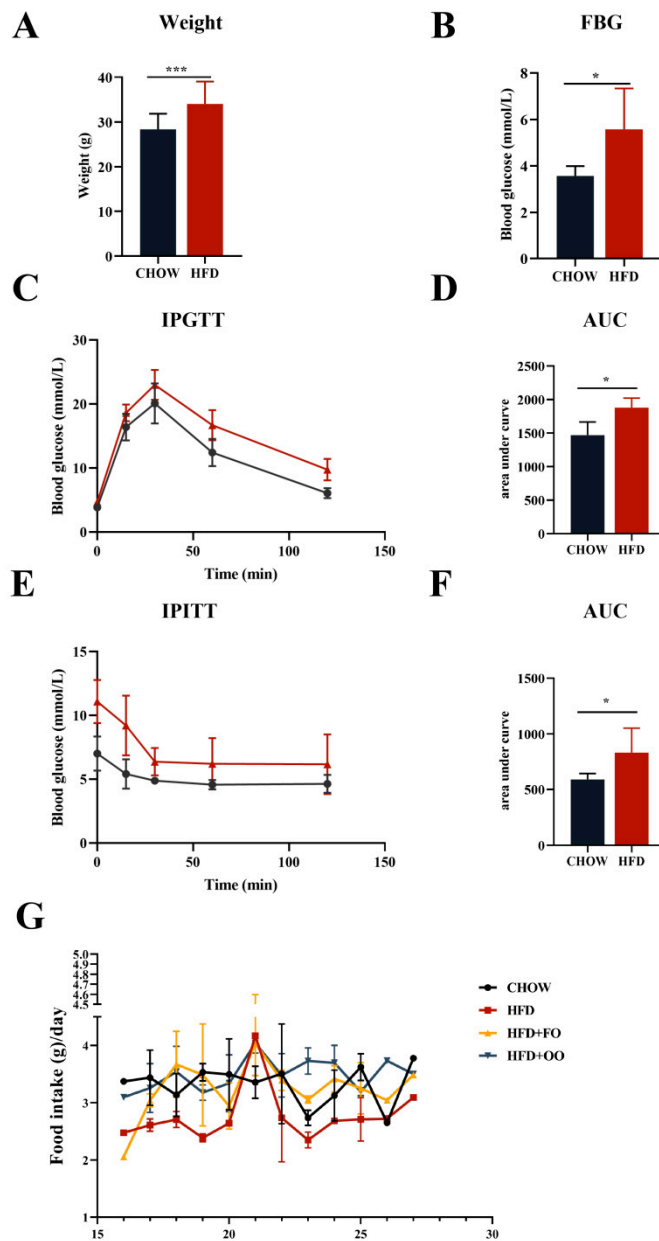

**Figure S3. HFD feeding for 16 w induces obesity and insulin resistance in mice.**

(A) Weight of mice. (B) FBG. (C) IPGTT. (D) The area under the curve (AUC) of IPGTT. (E) IPITT. (F) AUC of IPITT. (G) Time-related changes in food intake. \* $P < 0.05$ , \*\* $P < 0.01$ , \*\*\* $P < 0.001$ , Data are expressed as the mean  $\pm$  SD, ( $n \geq 5$ ).

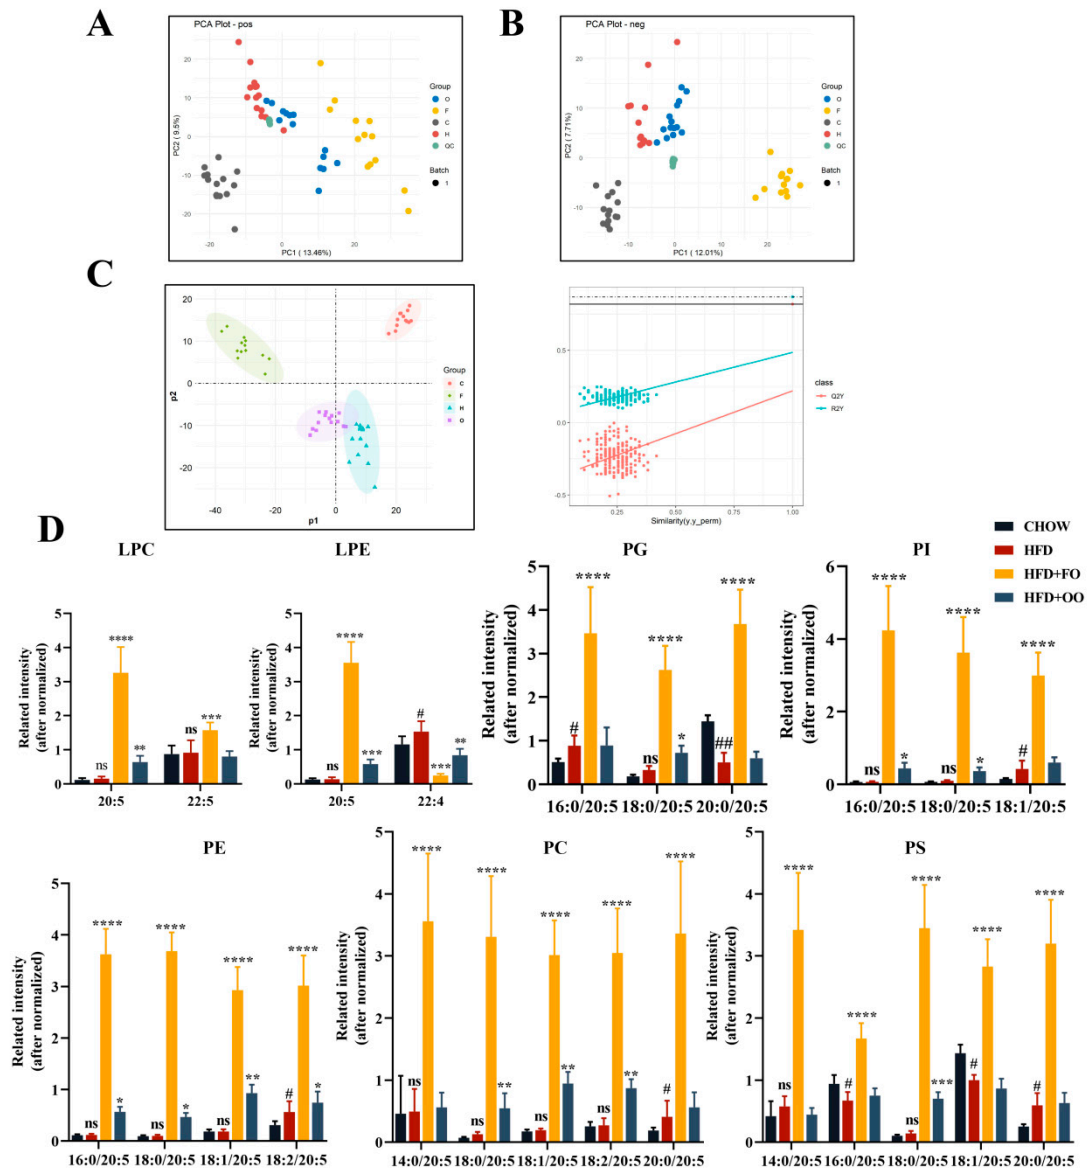

**Figure S4. Multivariate statistical analysis.**

(A) PCA diagram in positive ion mode. (B) PCA diagram in negative ion mode. (C) PLS-DA ( $R^2X=0.643$ ,  $R^2Y=0.869$ ,  $Q^2=0.819$ ), PLS-DA model for ranking test plots. (D) Significant lipids of FA 20:5. \*  $P<0.05$ , \*\*  $P<0.01$ , \*\*\*  $P<0.001$ , \*\*\*\*  $P<0.0001$  vs. HFD group. #  $P<0.05$ , ##  $P<0.01$  vs. CHOW group. Data are expressed as the mean  $\pm$  SD, ( $n \geq 13$ ).

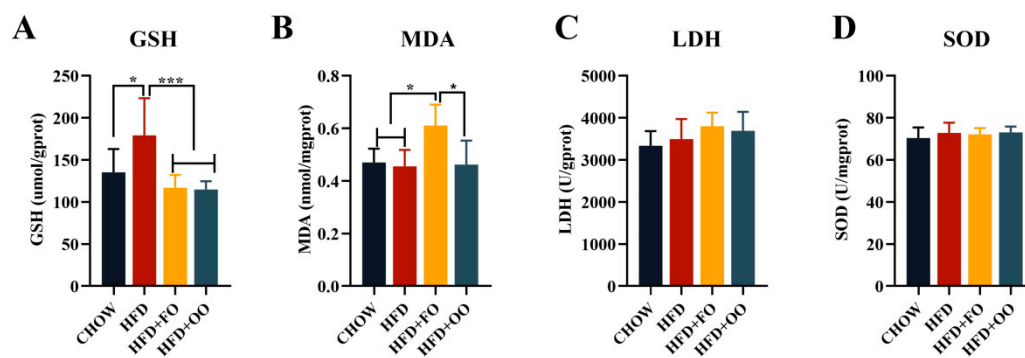

**Figure S5. Expression of antioxidant enzymes in the liver tissue of mice fed UFA diet for 12 w.**  
 (A) GSH content in liver tissue. (B) MDA content in liver tissue. (C) LDH content in liver tissue.  
 (D) SOD content in liver tissue. \* $P < 0.05$ , \*\*\* $P < 0.001$ , Data are expressed as the mean  $\pm$  SD, ( $n \geq 5$ ).

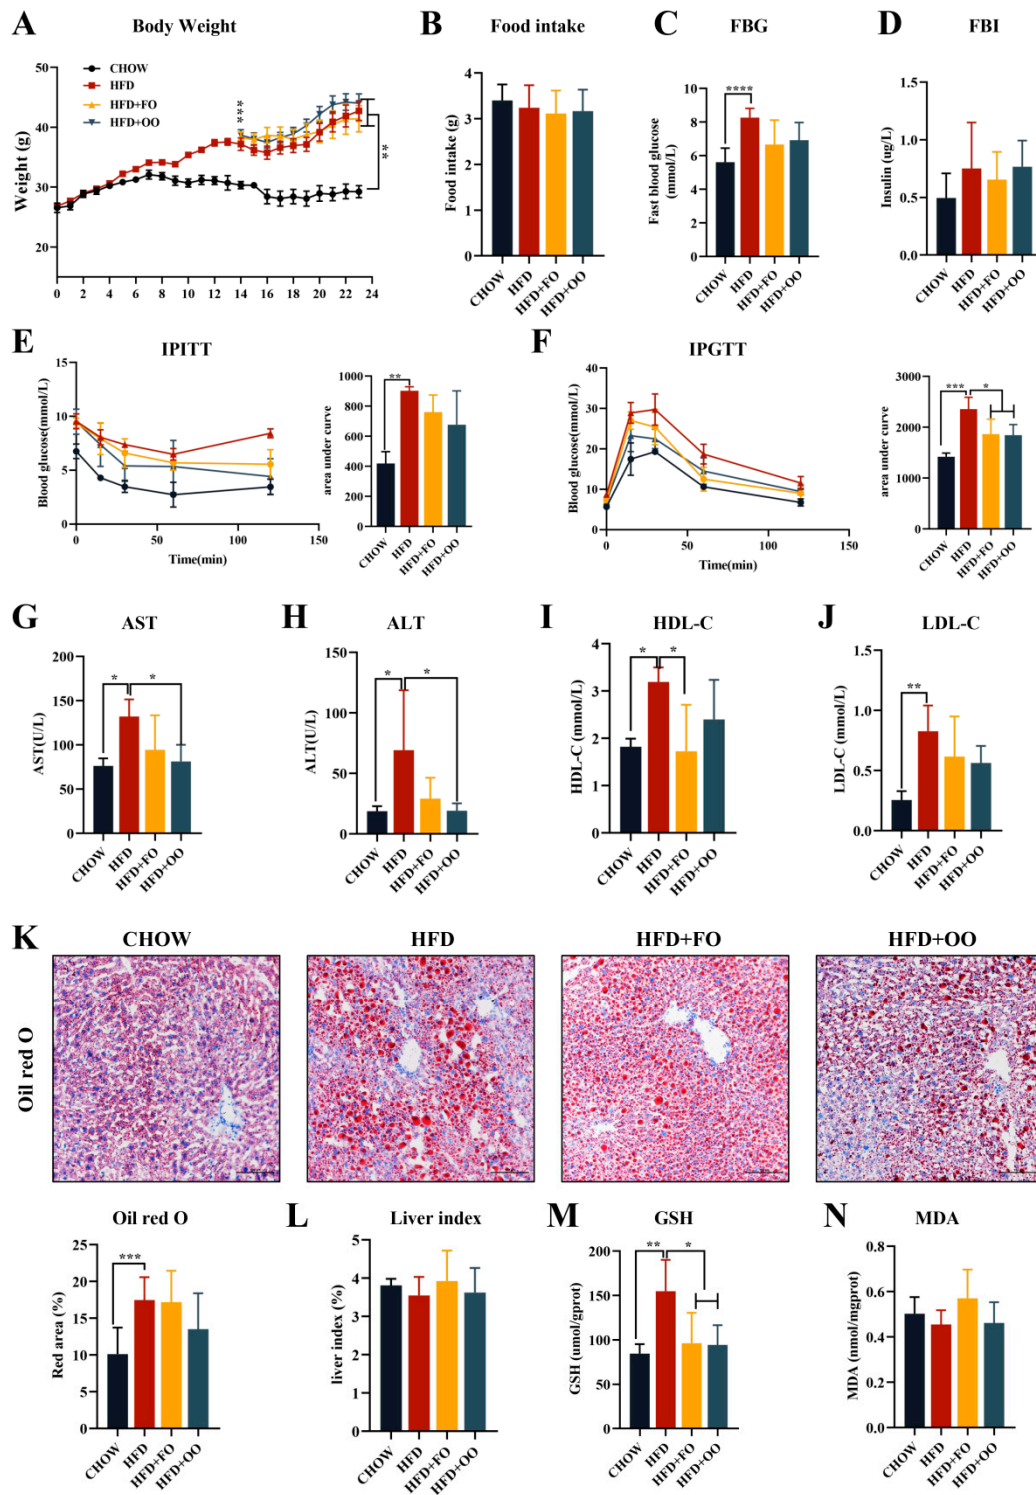

**Figure S6. Results of mice fed with UFA diets (replacing 5% energy of SFAs).** (A) Body weight. (B) Differences in food intake (g/mouse/day) between groups. (C) FBG. (D) FBI. (E) IPITT. (F) IPGTT. (G) AST. (H) ALT. (I) HDL-C. (J) LDL-C. (K) Oil Red O staining of liver (200X). (L) Liver index. (M) GSH content in liver tissue. (N) MDA content in liver tissue. \* $P < 0.05$ , \*\* $P < 0.01$ , \*\*\* $P < 0.001$ . Data are expressed as the mean  $\pm$  SD, ( $n \geq 5$ ).
